# Supplementary material
Source: PubMed Central journal article supplement (PMC3047812)
Supplement: cc0924_4893SD1.pdf [file cc0924_4893SD1.pdf]

## Supplementary figure

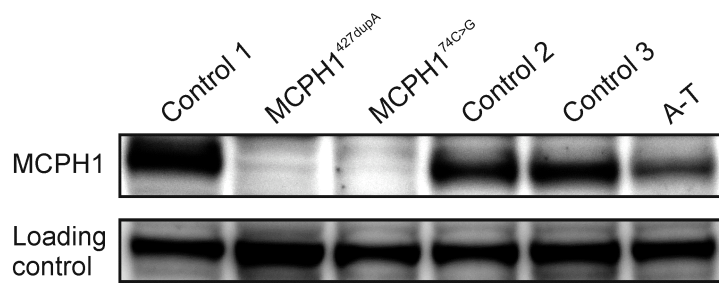

Immunodetection of MCPH1. Whole cell lysates prepared from LCLs of MCPH1 patients with the indicated mutations and from controls were blotted and detected with antibodies against MCPH1 according to standard procedures. Antibodies against nuclear matrix protein p84 were used as a loading control.
